# Supplementary material for: Exploration of pathophysiological pathways for incident atrial fibrillation using a multiplex proteomic chip
Source: PubMed Central journal article supplement — Open Heart. 2020 Mar 15;7(1):e001190. doi: 10.1136/openhrt-2019-001190 (PMC7076265; doi:10.1136/openhrt-2019-001190), 2020-03-15
Supplement: openhrt-2019-001190supp001.pdf [file openhrt-2019-001190supp001.pdf]

**SUPPLEMENTAL MATERIAL TO “EXPLORATION OF  
PATHOPHYSIOLOGICAL PATHWAYS FOR INCIDENT ATRIAL FIBRILLATION  
– THE MALMÖ PREVENTIVE PROJECT”**

John Molvin, Amra Jujic, Olle Melander, Manan Pareek, Lennart Råstam, Ulf Lindblad,  
Bledar Daka, Margrét Leósdóttir, Peter M. Nilsson, Michael H. Olsen & Martin Magnusson

**Contents**

|                                                                                                                                             |            |
|---------------------------------------------------------------------------------------------------------------------------------------------|------------|
| <b>Supplemental table 1. Unadjusted Cox regression analyses examining all 92 proteins<br/>relation to incident atrial fibrillation.....</b> | <b>2-3</b> |
| <b>List of abbreviations.....</b>                                                                                                           | <b>4</b>   |

**Supplemental table 1. Unadjusted Cox regression analyses examining all 92 proteins relation to incident atrial fibrillation**

| <b>Protein</b> | <b>Hazard ratio (95% confidence interval)</b> | <b>p-value</b>       |
|----------------|-----------------------------------------------|----------------------|
| PON3           | 0.80 (0.72-0.89)                              | 7.3x10 <sup>-5</sup> |
| IGFBP2         | 4.47 (1.42-14.1)                              | 0.011                |
| PAI            | 1.44 (0.65-3.18)                              | 0.371                |
| CTSD           | 2.45 (1.13-5.30)                              | 0.023                |
| FABP4          | 1.27 (1.13-1.44)                              | 8.6x10 <sup>-5</sup> |
| CD163          | 5.25 (1.14-24.1)                              | 0.033                |
| GAL4           | 1.30 (1.15-1.47)                              | 3.5x10 <sup>-5</sup> |
| LDL-receptor   | 0.81 (0.39-1.69)                              | 0.582                |
| IL1RT2         | 0.75 (0.24-2.34)                              | 0.614                |
| t-PA           | 2.75 (1.21-6.27)                              | 0.016                |
| SELE           | 0.99 (0.51-1.90)                              | 0.969                |
| CTSZ           | 2.97 (1.00-8.78)                              | 0.050                |
| GDF15          | 1.41 (1.25-1.59)                              | 9.7x10 <sup>-9</sup> |
| CSTB           | 3.75 (1.58-8.92)                              | 0.003                |
| MPO            | 4.48 (1.73-11.7)                              | 0.002                |
| PCSK9          | 1.18 (0.73-1.93)                              | 0.501                |
| IGFBP1         | 2.48 (1.42-4.35)                              | 0.001                |
| RARRES2        | 64.3 (1.87-2220.8)                            | 0.021                |
| ITGB2          | 1.01 (0.31-3.29)                              | 0.990                |
| CCL15          | 3.58 (0.96-13.3)                              | 0.057                |
| SCGB3A2        | 0.97 (0.71-1.32)                              | 0.839                |
| CHI3L1         | 1.26 (1.12-1.43)                              | 1.4x10 <sup>-4</sup> |
| CCL16          | 3.37 (1.05-10.8)                              | 0.041                |
| vWF            | 1.83 (1.04-3.23)                              | 0.036                |
| IGFBP7         | 1.27 (1.12-1.43)                              | 1.2x10 <sup>-4</sup> |
| AZU1           | 2.12 (1.39-3.24)                              | 0.001                |
| TNFR2          | 4.54 (1.75-11.8)                              | 0.002                |
| IL17RA         | 1.52 (0.77-2.98)                              | 0.225                |
| TNFR1          | 1.26 (1.12-1.42)                              | 1.6x10 <sup>-4</sup> |
| PSPD           | 1.34 (0.95-1.89)                              | 0.093                |
| UPAR           | 1.30 (1.15-1.47)                              | 3.7x10 <sup>-5</sup> |
| COL1A1         | 0.98 (0.60-1.60)                              | 0.937                |
| PI3            | 2.77 (1.48-5.17)                              | 0.001                |
| CPA1           | 1.04 (0.57-1.89)                              | 0.911                |
| ST2            | 2.41 (1.20-4.82)                              | 0.013                |
| TRAP           | 0.63 (0.17-2.31)                              | 0.488                |
| CPB1           | 1.02 (0.60-1.73)                              | 0.935                |
| MMP3           | 3.07 (1.01-9.30)                              | 0.047                |
| OPG            | 2.77 (1.28-5.99)                              | 0.010                |
| MCP1           | 1.89 (1.07-3.37)                              | 0.028                |
| TNFSF13B       | 3.93 (1.02-15.1)                              | 0.047                |
| PRTN3          | 3.10 (1.32-7.28)                              | 0.010                |
| EPHB4          | 1.39 (0.88-2.19)                              | 0.153                |
| IL18BP         | 5.65 (1.34-23.8)                              | 0.018                |
| ALCAM          | 1.39 (0.36-5.35)                              | 0.632                |
| FAS            | 2.08 (0.69-6.23)                              | 0.191                |

|              |                   |                       |
|--------------|-------------------|-----------------------|
| CXCL16       | 1.95 (0.33-11.6)  | 0.464                 |
| TNFRSF14     | 5.04 (1.86-13.7)  | 0.001                 |
| PDGFsubunitA | 1.15 (0.88-1.51)  | 0.297                 |
| AXL          | 12.9 (1.69-97.5)  | 0.014                 |
| PLC          | 11.5 (2.41-54.7)  | 0.002                 |
| JAMA         | 1.94 (1.11-3.93)  | 0.020                 |
| GRN          | 2.25 (0.83-6.05)  | 0.109                 |
| CD93         | 21.7 (1.55-304.9) | 0.022                 |
| MMP9         | 1.27 (0.82-1.95)  | 0.286                 |
| SHPS1        | 1.55 (0.76-3.13)  | 0.227                 |
| BLMhydrolase | 1.95 (0.65-5.89)  | 0.237                 |
| IL2RA        | 2.26 (1.00-5.10)  | 0.049                 |
| TFPI         | 0.99 (0.09-9.87)  | 0.947                 |
| APN          | 1.59 (0.42-6.03)  | 0.494                 |
| CCL24        | 1.14 (0.60-2.18)  | 0.691                 |
| MEPE         | 1.40 (0.91-2.16)  | 0.126                 |
| KLK6         | 0.80 (0.39-1.63)  | 0.533                 |
| DLK1         | 0.76 (0.33-1.78)  | 0.531                 |
| Notch3       | 3.14 (1.43-6.88)  | 0.004                 |
| SPON1        | 1.93 (1.28-2.91)  | 0.002                 |
| uPA          | 1.84 (0.60-5.61)  | 0.286                 |
| CNTN1        | 0.85 (0.43-1.65)  | 0.626                 |
| Gal3         | 1.77 (0.55-5.73)  | 0.340                 |
| TNFRSF10C    | 1.72 (0.58-5.14)  | 0.332                 |
| TR           | 2.69 (1.15-6.26)  | 0.022                 |
| CASP3        | 1.81 (1.03-3.19)  | 0.039                 |
| OPN          | 1.38 (1.22-1.56)  | 4.2x10 <sup>-7</sup>  |
| MB           | 6.87 (2.18-21.7)  | 0.001                 |
| MMP2         | 1.29 (1.14-1.47)  | 6.6x10 <sup>-5</sup>  |
| TFF3         | 6.15 (2.06-18.4)  | 0.001                 |
| TIMP4        | 3.78 (1.52-9.39)  | 0.004                 |
| PECAM1       | 1.74 (0.76-4.03)  | 0.192                 |
| CHIT1        | 1.21 (0.85-1.73)  | 0.292                 |
| RETN         | 5.86 (1.70-20.1)  | 0.005                 |
| IL1RT1       | 2.33 (0.39-13.8)  | 0.351                 |
| LTBR         | 1.97 (0.83-4.67)  | 0.126                 |
| SELP         | 2.14 (0.53-8.61)  | 0.286                 |
| CCL22        | 1.23 (0.96-1.57)  | 0.109                 |
| PGLYRP1      | 5.83 (1.35-25.2)  | 0.018                 |
| ICAM2        | 1.32 (0.49-3.60)  | 0.585                 |
| TLT2         | 1.55 (0.69-3.45)  | 0.286                 |
| EGFR         | 0.67 (0.45-1.00)  | 0.050                 |
| CDH5         | 1.14 (0.52-2.50)  | 0.737                 |
| IL6RA        | 1.59 (0.12-21.9)  | 0.728                 |
| EpCAM        | 0.69 (0.47-1.02)  | 0.065                 |
| NT-proBNP    | 1.95 (1.75-2.19)  | 5.1x10 <sup>-32</sup> |

Aminopeptidase N (AP-N)  
 Azurocidin (AZU1)  
 Bleomycin hydrolase (BLM hydrolase)  
 C-C motif chemokine 15 (CCL15)  
 C-C motif chemokine 16 (CCL16)  
 C-C motif chemokine 24 (CCL24)  
 C-X-C motif chemokine 16 (CXCL16)  
 Cadherin-5 (CDH5)  
 Carboxypeptidase A1 (CPA1)  
 Carboxypeptidase B (CPB1)  
 Caspase-3 (CASP-3)  
 Cathepsin D (CTSD)  
 Cathepsin Z (CTSZ)  
 CD166 antigen (ALCAM)  
 Chitinase-3-like protein 1 (CHI3L1)  
 Chitotriosidase-1 (CHIT1)  
 Collagen alpha-1(I) chain (COL1A1)  
 Complement component C1q receptor (CD93)  
 Contactin-1 (CNTN1)  
 Cystatin-B (CSTB)  
 E-selectin (SELE)  
 Elafin (PI3)  
 Ephrin type-B receptor 4 (EPHB4)  
 Epidermal growth factor receptor (EGFR)  
 Epithelial cell adhesion molecule (Ep-CAM)  
 Fatty acid-binding protein, adipocyte (FABP4)  
 Galectin-3 (Gal-3)  
 Galectin-4 (Gal-4)  
 Granulins (GRN)  
 Growth/differentiation factor 15 (GDF-15)  
 Insulin-like growth factor-binding protein 1 (IGFBP-1)  
 Insulin-like growth factor-binding protein 2 (IGFBP-2)  
 Insulin-like growth factor-binding protein 7 (IGFBP-7)  
 Integrin beta-2 (ITGB2)  
 Intercellular adhesion molecule 2 (ICAM-2)  
 Interleukin-1 receptor type 1 (IL-1RT1)  
 Interleukin-1 receptor type 2 (IL-1RT2)  
 Interleukin-17 receptor A (IL-17RA)  
 Interleukin-18-binding protein (IL-18BP)  
 Interleukin-2 receptor subunit alpha (IL2-RA)  
 Interleukin-6 receptor subunit alpha (IL-6RA)  
 Junctional adhesion molecule A (JAM-A)  
 Kallikrein-6 (KLK6)  
 Low-density lipoprotein receptor (LDL receptor)  
 Lymphotoxin-beta receptor (LTBR)  
 Matrix extracellular phosphoglycoprotein (MEPE)  
 Matrix metalloproteinase-2 (MMP-2)  
 Matrix metalloproteinase-3 (MMP-3)  
 Matrix metalloproteinase-9 (MMP-9)  
 Metalloproteinase inhibitor 4 (TIMP4)  
 Monocyte chemotactic protein 1 (MCP-1)  
 Myeloblastin (PRTN3)  
 Myeloperoxidase (MPO)  
 Myoglobin (MB)  
 N-terminal prohormone brain natriuretic peptide (NT-proBNP)  
 Neurogenic locus notch homolog protein 3 (Notch 3)  
 Osteopontin (OPN)  
 Osteoprotegerin (OPG)  
 P-selectin (SELP)  
 Paraoxonase (PON3)  
 Peptidoglycan recognition protein 1 (PGLYRP1)  
 Perlecan (PLC)  
 Plasminogen activator inhibitor 1 (PAI)  
 Platelet endothelial cell adhesion molecule (PECAM-1)  
 Platelet glycoprotein VI (GP6)  
 Platelet-derived growth factor subunit A (PDGF subunit A)  
 Proprotein convertase subtilisin/kexin type 9 (PCSK9)  
 Protein delta homolog 1 (DLK-1)  
 Pulmonary surfactant-associated protein D (PSP-D)  
 Resistin (RETN)  
 Retinoic acid receptor responder protein 2 (RARRES2)  
 Scavenger receptor cysteine-rich type 1 protein M130 (CD163)  
 Secretoglobin family 3A member 2 (SCGB3A2)  
 Spondin-1 (SPON1)  
 ST2 protein (ST2)  
 Tartrate-resistant acid phosphatase type 5 (TR-AP)  
 Tissue factor pathway inhibitor (TFPI)  
 Tissue-type plasminogen activator (t-PA)  
 Transferrin receptor protein 1 (TR)  
 Trefoil factor 3 (TFF3)  
 Trem-like transcript 2 protein (TLT-2)  
 Tumor necrosis factor ligand superfamily member 13B (TNFSF13B)  
 Tumor necrosis factor receptor 1 (TNF-R1)  
 Tumor necrosis factor receptor 2 (TNF-R2)  
 Tumor necrosis factor receptor superfamily member 10C (TNFRSF10C)  
 Tumor necrosis factor receptor superfamily member 14 (TNFRSF14)  
 Tumor necrosis factor receptor superfamily member 6 (FAS)  
 Tyrosine-protein kinase receptor UFO (AXL)  
 Tyrosine-protein phosphatase non-receptor type substrate 1 (SHPS-1)  
 Urokinase plasminogen activator surface receptor (U-PAR)  
 Urokinase-type plasminogen activator (uPA)  
 von Willebrand factor (vWF)
